# Supplementary material for: Alteration of mitochondrial efficiency affects oxidative balance, development and growth in frog (Rana temporaria) tadpoles
Source: Oxford University Press journal article supplement (doi:10.1242/jeb.062745), 2012-02-08
Supplement: jeb062745tables1-s2.pdf [file jeb062745tables1-s2.pdf]

**Table S1:** Analyses of covariance of effect of period (after 16 and 34 days of exposure), treatment (water and ethanol) and their interaction on larval development stage, body mass and metabolic rate.

| <i>Factors</i>            | <b>Stade</b>                                  | <b>VO<sub>2</sub></b>                         | <b>Mass</b>                                  |
|---------------------------|-----------------------------------------------|-----------------------------------------------|----------------------------------------------|
| <i>Period</i>             | F <sub>1,74</sub> =514.506<br><i>P</i> <0.001 | F <sub>1,73</sub> =200.008<br><i>P</i> <0.001 | F <sub>1,73</sub> =8.288<br><i>P</i> =0.005  |
| <i>Treatment</i>          | F <sub>1,74</sub> =0.755<br><i>P</i> =0.387   | F <sub>1,73</sub> =0.194<br><i>P</i> =0.661   | F <sub>1,73</sub> =0.0001<br><i>P</i> =0.992 |
| <i>Period * Treatment</i> | F <sub>1,74</sub> =0.590<br><i>P</i> =0.448   | F <sub>1,73</sub> =2.022<br><i>P</i> =0.159   | F <sub>1,73</sub> =0.0187<br><i>P</i> =0.890 |

**Table S2:** Statistical analyses of effect of ethanol treatment on tadpole parameters. Variables have been measured only at 34 days of exposure; the treatment effect has been analyzed using Student's t test.

| <i>Factors</i>                                                                         | <b>df</b> | <b>t</b> | <b>P</b> |
|----------------------------------------------------------------------------------------|-----------|----------|----------|
| <i>Mitochondrial oxygen consumption at state 3</i>                                     | 16        | 0.55     | 0.59     |
| <i>Mitochondrial oxygen consumption at state 4</i>                                     | 16        | 0.00     | 0.95     |
| <i>Mitochondrial cytochrome c oxidative activity</i>                                   | 16        | 1.44     | 0.17     |
| <i>Respiratory Control Ratio</i>                                                       | 16        | 1.14     | 0.27     |
| <i>Slope of the linear relation ATP/O</i>                                              | 16        | 1.52     | 0.14     |
| <i>Mitochondrial oxygen consumption at state 3 (in presence of glucose/hexokinase)</i> | 16        | 0.62     | 0.54     |
| <i>Mitochondrial oxygen consumption at state 4 (in presence of glucose/hexokinase)</i> | 16        | 0.52     | 0.61     |
| <i>Mitochondrial ATP synthesis at state 3</i>                                          | 16        | 0.10     | 0.93     |
| <i>Mitochondrial ROS generation</i>                                                    | 16        | 0.72     | 0.48     |
| <i>Lipid oxidative damage</i>                                                          | 24        | 0.56     | 0.58     |
| <i>Total antioxidant capacities</i>                                                    | 29        | 0.55     | 0.59     |
